1 **Beginning section**

2 **Title page:**

3 Full title:

4 AN EPIDEMIOLOGICAL MODEL TO AID DECISION-MAKING

5 FOR COVID-19 CONTROL IN SRI LANKA

6

7 Short title:

8 AN EPIDEMIOLOGICAL MODEL FOR COVID-19 DECISION-MAKING

9

10 Authors:

11 Dileepa Senajith Ediriweera<sup>1</sup>, Nilanthi Renuka de Silva<sup>2</sup>, Neelika Gathsaurie Malavige<sup>3</sup>,

12 Hithanadura Janaka de Silva<sup>4</sup>

13

14 Affiliations:

15 <sup>1</sup> Centre for Health Informatics, Biostatistics and Epidemiology, Faculty of Medicine,

16 University of Kelaniya, Ragama, Sri Lanka.

17 <sup>2</sup> Department of Parasitology, Faculty of Medicine, University of Kelaniya, Ragama, Sri

18 Lanka

19 <sup>3</sup> Department of Microbiology, Faculty of Medical Sciences, University of Sri

20 Jayewardenepura, Nugegoda, Sri Lanka

21 <sup>4</sup> Department of Medicine, Faculty of Medicine, University of Kelaniya, Ragama, Sri Lanka

22

23

24 Corresponding author:

25 Dileepa Ediriweera email: [dileepa@kln.ac.lk](mailto:dileepa@kln.ac.lk)

26

## 27 **Abstract**

28 Background: Sri Lanka diagnosed its first local case of COVID-19 on 11 March 2020. The  
29 government acted swiftly to contain transmission, with extensive public health measures. At  
30 the end of 30 days, Sri Lanka had 197 cases, 54 recovered and 7 deaths; a staged relaxing of  
31 the lockdown is now underway. This paper proposes a theoretical basis for estimating the  
32 limits within which transmission should be constrained in order to ensure that the case load  
33 remains within the capacity of the health system.

34

35 Methods: We used Susceptible, Infected, Recovered model to estimate the ICU bed  
36 requirement at different levels of  $R_0$  values after lockout. We developed a web application  
37 that enables visualization of cases and ICU bed requirements with time, with adjustable  
38 parameters that include: population exposed; proportion asymptomatic; number of active and  
39 recovered cases; infectious period;  $R_0$  or doubling time; proportion critically ill; available  
40 ICU beds and duration of ICU stay.

41

42 Results: The three-day moving average of the caseload suggested two waves of transmission  
43 from Day 0 to 17 ( $R_0=3.32$ , 95% CI 1.85 - 5.41) and from Day 18 - 30 ( $R=1.25$ , 95% CI: 0.93  
44 - 1.63). We estimate that if there are 156 active cases with 91 recovered at the time of  
45 lockout, and  $R$  increases to 1.5 (doubling time 19 days), under the standard parameters for Sri  
46 Lanka, the ICU bed capacity of 300 is likely to be saturated by about 100 days, signalled by  
47 18 new infections (95% CI 15 - 22) on Day 14 after lockout.

48

49 Conclusion: Our model suggests that to ensure that the case load remains within the available  
50 capacity of the health system after lockout, transmission should not exceed  $R=1.5$ . This

- 51 model and the web-based application may be useful in other low- and middle-income
- 52 countries which have similar constraints on health resources.

## 53 **Introduction**

54 COVID-19 is caused by a new coronavirus (SARS CoV-2) that emerged in China in  
55 December 2019. Although it causes an asymptomatic or mild infection in most instances, it  
56 can cause severe respiratory illness or even death. Transmission is mainly via droplets  
57 released into the air when an infected person coughs or sneezes. Aerosol and fomite  
58 transmission of SARS-CoV-2 is also possible (1) (2). There is no vaccine at present, nor is  
59 there any antiviral agent of proven efficacy. Thus traditional measures that control the spread  
60 of infectious diseases such as quarantine, contact tracing, isolation of positives and contacts  
61 as well as social distancing and hand-washing are of vital importance.

62

63 The basic reproduction number ( $R_0$ ) is a central concept in infectious disease epidemiology,  
64 representing the average number of new infections generated by an infectious person in a  
65 completely susceptible population. For COVID-19,  $R_0$  has been estimated by the WHO to be  
66 1.4 – 2.5. Others have placed it higher, at a median of 2.79 with an interquartile (IQR) range  
67 of 1.16 (3). For comparison, seasonal flu has a reported median  $R_0$  of 1.28 (IQR, 1.19–1.37),  
68 while measles has an  $R_0$  of 12–18 (4).

## 69 **Situation in Sri Lanka**

70 The 1<sup>st</sup> case of COVID-19 was diagnosed in Sri Lanka on 27 January 2020, in a tourist from  
71 China. The 2<sup>nd</sup> case was detected nearly 6 weeks later, on 11 March, in a tour guide who  
72 probably contracted the infection from Italian tourists. Since then, the spread of infection has  
73 been relatively slow, and mostly confined to returnees from countries with high transmission,  
74 and their contacts. However, it must be noted that in four of the 190 cases diagnosed in the  
75 30 days from 11 March to 10 April 2020, it was not possible to identify the source of  
76 infection. It took nearly a week for the caseload to double from 50 (on 19 March) to 100 on

77 (25 March). It had not yet doubled again as of 11th April, when the count was 197 cases, with  
78 54 recovered and 7 deaths (5). The epidemic has not yet reached the stage of full-blown  
79 community transmission, and almost all cases still occur in clusters where the chain of  
80 transmission can be traced.

81

82 The government of Sri Lanka acted swiftly to contain transmission, with very stringent public  
83 health measures and social distancing: complete island-wide lockdown, contact tracing and  
84 isolation, and quarantine of all inbound passengers were all adopted almost simultaneously.

85 The airport has been closed for inbound passengers since 19 March. The national policy with  
86 regard to testing was that all symptomatic individuals clinically suspected of infection with  
87 SARS-CoV-2, should be tested in one of seven designated laboratories, using PCR as a  
88 diagnostic tool. All positive individuals (regardless of severity of illness) are managed in one  
89 of three state hospitals, designated for management of COVID-19. These hospitals are also  
90 equipped with intensive care units and ventilators for management of the critically ill.

91 However, the control measures have exacted a very heavy social and economic cost, and the  
92 state is now about to implement a phased relaxation of preventive measures. For economic  
93 and social reasons, the government will be forced to re-open Sri Lanka's borders in the near  
94 future, while the pandemic is still going on elsewhere.

#### 95 **Potential impact of COVID-19**

96 It has been suggested that most people infected with SAR-CoV-2 show no symptoms but are  
97 still able to infect others. Blanket testing of an isolated village of about 3000 individuals in  
98 northern Italy found that 50 – 75% of infected individuals were asymptomatic (6). Analysis  
99 of the outbreak in China found that 81% of symptomatic individuals had mild illness,  
100 whereas 14% developed severe illness (i.e., dyspnea, respiratory frequency  $\geq 30/\text{min}$ , blood

101 oxygen saturation  $\leq 93\%$ , partial pressure of arterial oxygen to fraction of inspired oxygen  
102 ratio  $< 300$ , and/or lung infiltrates  $> 50\%$  within 24 to 48 h) and another 5% became critically  
103 ill with respiratory failure, septic shock, and/or multiple organ dysfunction or failure (7). It is  
104 the provision of effective care for this last group of patients, who may require ventilation for  
105 2 – 3 weeks, that is the crucial limiting factor in any health system.

106

107 The global numbers as of 10 April were 1,617,204 cases, 364,686 recovered, and 97,039  
108 deaths, which suggests a case fatality rate of 5.5% (8). Of the first 140 patients treated for  
109 COVID-19 at the Infectious Disease Hospital in Sri Lanka, where the majority of patients  
110 have been managed, nine (6.4%) have required intensive care; a similar proportion to that  
111 reported from Wuhan. Sri Lanka's case fatality rate has been 3.7% (7/197) as of 11 April  
112 2020.

113

114 If the spread of infection is not controlled, the  $R_0$  of SARS-CoV-2 is such that it sweeps  
115 swiftly through the susceptible population, resulting in a large number of very ill persons  
116 within a short period of time, thus overloading the health system and causing it to collapse.  
117 However, it is clearly possible to slow down transmission, as has been demonstrated in Sri  
118 Lanka. The availability of beds and ventilators in hospital intensive care units (ICU), to care  
119 for critically ill patients, is the major constraining factor that has been observed in all  
120 countries with large epidemics. Sri Lanka will need to closely monitor and control the rate of  
121 spread of infection so that the requirement for ICU beds and ventilators remains within the  
122 available capacity.

123

124 This paper proposes a theoretical basis for estimating the limit within which the reproduction  
125 number should be constrained, in order to ensure that the infection spreads slowly, and the  
126 COVID-19 case load remains within the capacity of Sri Lanka's health system.

127

## 128 **Middle section**

### 129 **Materials and Methods**

130 We used publicly available data for the analysis. The 3-day moving average of cases  
131 diagnosed each day during the period 11 March to 15 April were plotted (see Figure 1).  
132 These numbers are based on a policy of screening all symptomatic individuals clinically  
133 suspected of infection with SARS-CoV-2, using PCR as a diagnostic tool, as recorded in the  
134 daily situation reports released by the Epidemiology Unit of the Ministry of Health. It should  
135 be noted that an exception to this policy was made on 31 March, when screening was  
136 extended to contacts, and 10 of the 21 cases reported on 1 April were asymptomatic positives.  
137 Using the maximum likelihood method in the R0 package in R programming language (9),  
138 we calculated R over the first 35 days.

139

140 We used the Susceptible, Infected, Recovered (SIR) model to explore the number of new  
141 infections and estimated ICU bed requirements at different levels of  $R_0$  values after lockout.  
142 These  $R_0$  values were selected to represent the range within which transmission may be  
143 constrained, and assuming that it will increase after lockout (Table 1).

144

145



146 Table 1:  $R_0$  values and doubling time of infections

| $R_0$ | Doubling time of active infections |
|-------|------------------------------------|
| 1.3   | 32 days                            |
| 1.4   | 24 days                            |
| 1.5   | 19 days                            |
| 1.6   | 16 days                            |
| 1.7   | 14 days                            |
| 1.8   | 12 days                            |

147

148

149 We developed a web-based interactive application using an R Shiny package (available  
150 through this link: [bit.ly/COVID19\\_ICU](https://bit.ly/COVID19_ICU)) that enables visualization of cases and ICU bed  
151 requirements with time under different values of  $R$ , with the following adjustable parameters  
152 that include the total population exposed; the proportion of asymptomatic individuals among  
153 those infected; the number of active cases; the number of recovered cases; the infectious  
154 period in days;  $R_0$  or doubling time in days; the percentage who are expected to become  
155 critically ill; the available number of ICU beds; the average duration of ICU stay in days; and  
156 uncertainty of projection.

157

158 We calculated the scenarios that emerge at different values of  $R$ , in terms of active infections  
159 and ICU requirements subsequent to lockout on 20 April 2020, under the following  
160 assumptions:

- 161 1. the entire population of Sri Lanka (22 million) is susceptible to infection,
- 162 2. there are 156 active cases, and 91 recovered (as recorded by the Epidemiology Unit of
- 163 the Ministry of Health on 19 April),
- 164 3. 50% of all infections are asymptomatic or pre-symptomatic and therefore
- 165 undiagnosed,
- 166 4. the average infectious period is 14 days,
- 167 5. 5% of symptomatic patients will require ICU care,
- 168 6. the average duration of ICU stay is 2 weeks,
- 169 7. maximum critical care capacity = 300 ICU beds and ventilators

170 At present, the state hospitals in Sri Lanka have a total of about 670 functional ICU beds with  
171 ventilators. While retaining capacity for management of patients with other illnesses, we  
172 assumed that up to 300 of these ICU beds may be made available for management of  
173 COVID-19 patients at the peak of the epidemic.

174

## 175 Results

176 The three-day moving average of daily new cases over the first month (Figure 1) is  
177 suggestive of two waves of transmission, and so we calculated R separately for these two  
178 periods. The first wave, from Day 0 to Day 17 was largely due to infections among foreign  
179 returnees ( $R_0 = 3.32$  [95%CI: 1.85 - 5.41]). The second wave was largely due to local  
180 transmission among their contacts ( $R_2 = 1.25$  [95%CI: 0.93 - 1.63]).

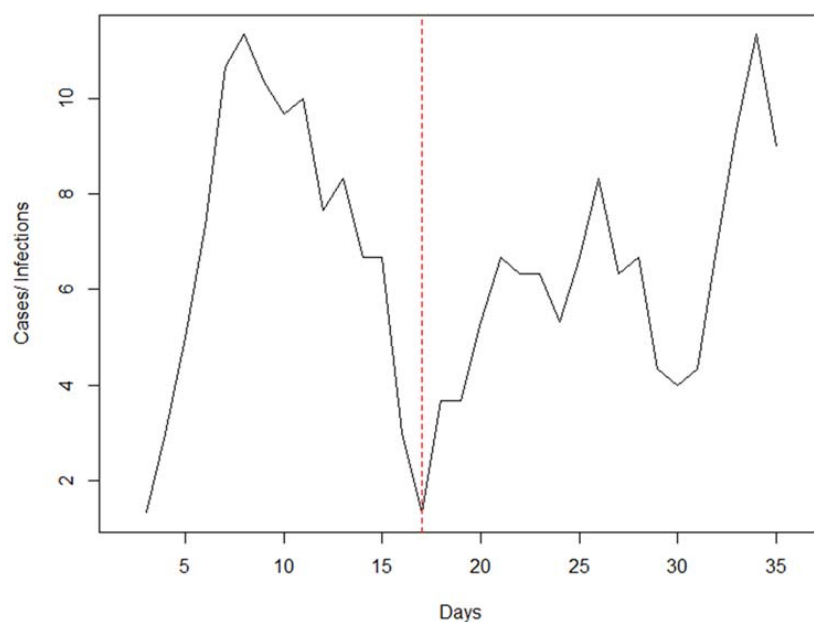

181  
182 Fig 1. Three-day moving average of new cases, 11th March to 15th April. Red dashed line  
183 indicate day 17.

184  
185 Figure 2 shows the possible course of the epidemic if transmission remained at the initial  
186 level seen during the first wave of transmission ( $R=3.32$ ). This model suggests that the  
187 epidemic would have peaked in about 3 months, with more than 5,000,000 affected  
188 individuals at the peak of the epidemic.

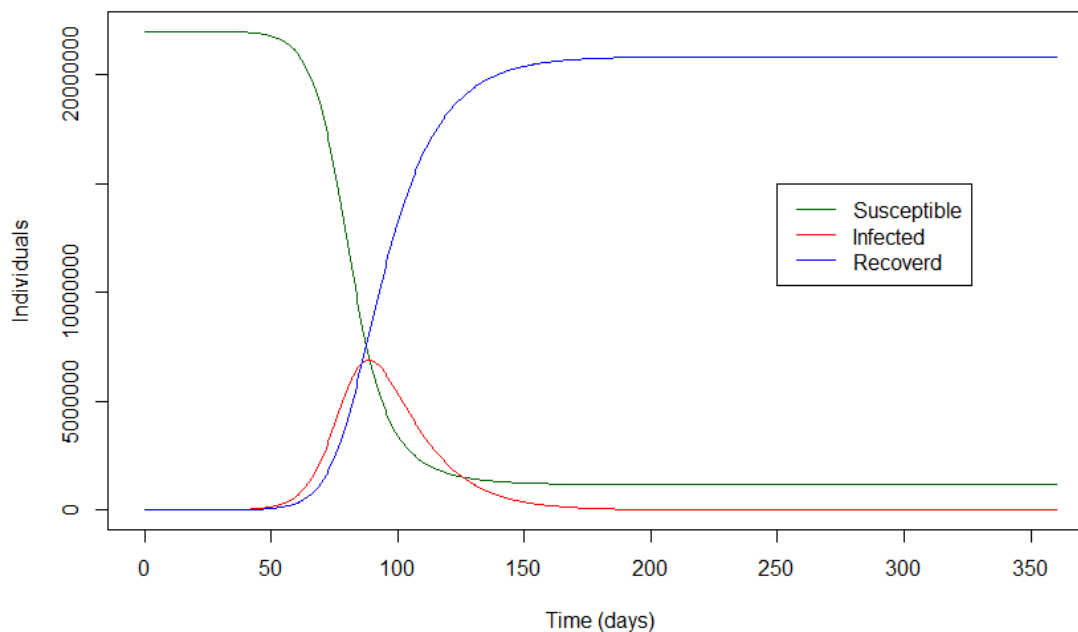

189

190

Fig 2. Natural progression of COVID-19 epidemic when  $R=3.32$ .

191

192 Figure 3 shows the interface of the web-based application. This web-based application plots  
193 the expected epidemic curve under the user input parameters and provides projections on  
194 expected new infections on day 7, 14, 21 and 30, new infections by day 7, 14, 21 and 30, day  
195 of the peak epidemic, infected patients at peak, critically ill patients at peak, required ICU  
196 bed days at peak and the day of the ICU saturation under each scenario.

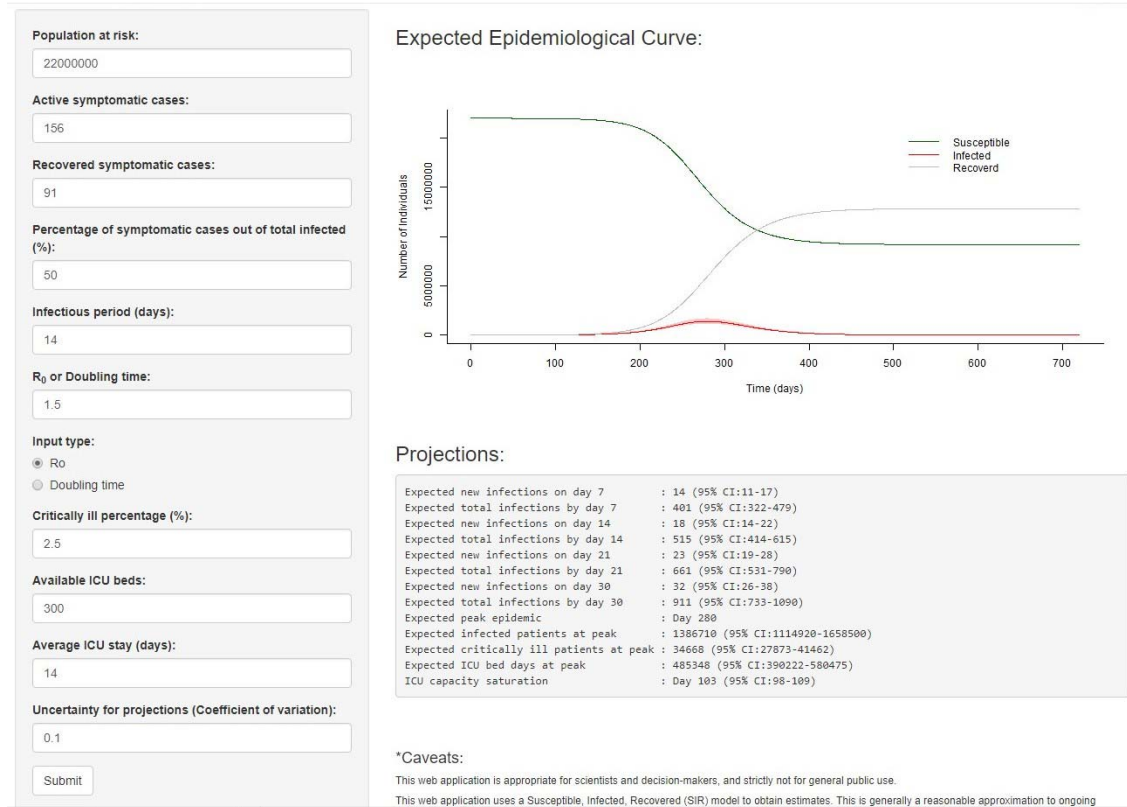

197

198

Fig 3. Interface of the web-based application (URL: [bit.ly/COVID19\\_ICU](https://bit.ly/COVID19_ICU))

199

200

201 Figure 4 shows how the spread of infection could progress at each of the selected levels of

202  $R_0$ . It can be seen that as the value of  $R_0$  decreases, the curve becomes flatter: the peak arrives

203 progressively later, and affects a smaller number of individuals at any one time.

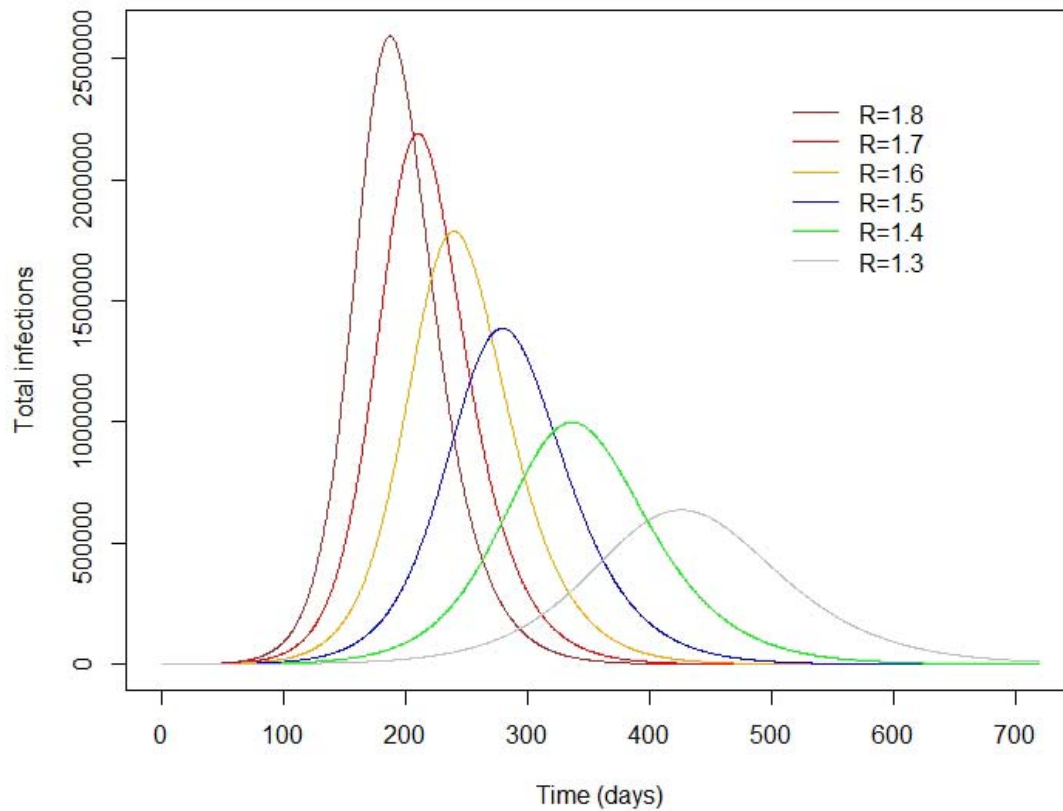

204

205

Fig 4. The epidemic curve over time at selected values of R

206

207 Figure 5 shows how saturation of ICU bed capacity (300 beds) could be delayed, as the value  
208 of R becomes lower. The curves suggest that while saturation of ICU bed capacity would not  
209 occur until about 6 months have elapsed at the lowest value of R selected (R=1.3), this would  
210 happen in about 2 months if R=1.8, the highest value selected.

211

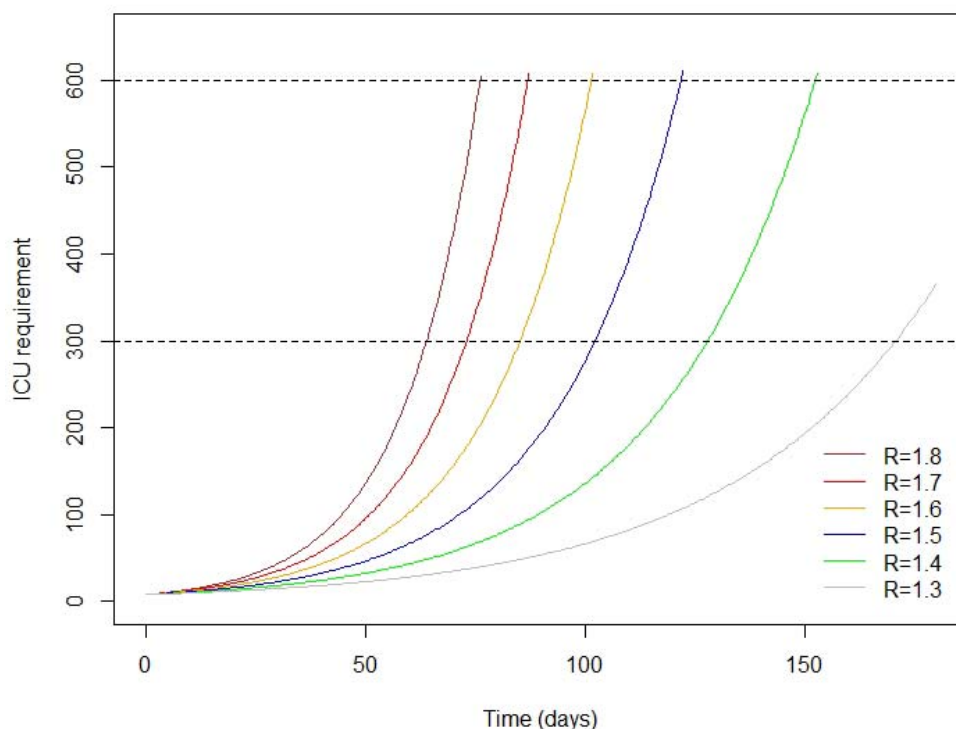

212

213

214 Fig 5. Saturation of ICU bed capacity: changes with time at selected values of R

215

216 We then estimate active infections predicted on Days 7, 14, 21 and 30 after lockout and the  
217 day of ICU saturation (300 beds) at different values of R (see Table 2), and the predicted new  
218 infections over this same period (see Table 3). This suggests that a R value of 1.5 or above  
219 would result in saturation of ICU capacity within about 3 months of lockout, and this would  
220 be likely if the number of active infections reaches 515 (95% CI 414 - 615) and  
221 approximately 18 (95% CI 14 - 22) new infections on Day 14 after lockout. Based on our  
222 assumption that 50% of infections are asymptomatic, this means the number of active  
223 symptomatic cases on Day 14 after lockout would have increased to about 255 and the  
224 number of new symptomatic cases would be about 9.

225 Table 2. Predicted active infections and ICU bed saturation at selected values of R after  
 226 lockout

| R value<br>(Day of the<br>expected peak) | Active<br>infections<br>after 7 days<br>(95% CI) | Active<br>infections<br>after 14 days<br>(95% CI) | Active<br>infections after<br>21 days<br>(95% CI) | Active<br>infections<br>after 30 days<br>(95% CI) | ICU<br>saturation<br>on day<br>(95% CI) |
|------------------------------------------|--------------------------------------------------|---------------------------------------------------|---------------------------------------------------|---------------------------------------------------|-----------------------------------------|
| 1.3 (Day 426)                            | 363<br>(291-434)                                 | 421<br>(339-504)                                  | 489<br>(394-585)                                  | 594<br>(477-710)                                  | 171<br>(163-181)                        |
| 1.4 (Day 337)                            | 381<br>(306-456)                                 | 466<br>(374-557)                                  | 569<br>(457-680)                                  | 736<br>(591-880)                                  | 128<br>(122-136)                        |
| 1.5 (Day 280)                            | 401<br>(322-479)                                 | 515<br>(414-615)                                  | 661<br>(531-790)                                  | 911<br>(733-1090)                                 | 103<br>(98-109)                         |
| 1.6 (Day 240)                            | 421<br>(339-504)                                 | 569<br>(457-680)                                  | 768<br>(617-918)                                  | 1129<br>(908-1351)                                | 86<br>(81-91)                           |
| 1.7 (Day 210)                            | 443<br>(356-530)                                 | 629<br>(505-752)                                  | 892<br>(717-1067)                                 | 1399<br>(1125-1674)                               | 74<br>(70-78)                           |
| 1.8 (Day 187)                            | 466<br>(374-557)                                 | 695<br>(559-831)                                  | 1037<br>(833-1240)                                | 1734<br>(1394-2074)                               | 64<br>(61-68)                           |

227

228



229 Table 3. Expected new infections on day 7, 14, 21 and 30 at selected values of R

| R value<br>(Day of the<br>expected peak) | New infections<br>on day 7<br>(95% CI) | New infections<br>on day 14<br>(95% CI) | New infections<br>on day 21<br>(95% CI) | New infections<br>on day 30<br>(95% CI) |
|------------------------------------------|----------------------------------------|-----------------------------------------|-----------------------------------------|-----------------------------------------|
| 1.3 (Day 426)                            | 8 (6-9)                                | 9 (7-11)                                | 10 (8-12)                               | 13 (10-15)                              |
| 1.4 (Day 337)                            | 11 (9-13)                              | 13 (10-16)                              | 16 (13-19)                              | 21 (17-25)                              |
| 1.5 (Day 280)                            | 14 (11-17)                             | 18 (14-22)                              | 23 (19-28)                              | 32 (26-38)                              |
| 1.6 (Day 240)                            | 18 (14-21)                             | 24 (19-29)                              | 32 (26-38)                              | 47 (38-57)                              |
| 1.7 (Day 210)                            | 22 (17-26)                             | 31 (25-37)                              | 44 (35-52)                              | 68 (55-82)                              |
| 1.8 (Day 187)                            | 26 (21-31)                             | 39 (31-46)                              | 58 (46-69)                              | 96 (78-115)                             |

230

231

## 232 Discussion

233 Our findings suggest that the multiple control measures adopted in Sri Lanka during March  
234 2020, which includes prompt contact tracing and isolation, border closure and complete  
235 lockdown, have enabled reduction in transmission from an initial level ( $R=3.0$ ) that would  
236 have almost certainly overwhelmed Sri Lanka's health system within a month, peaking in  
237 about 3 months, with well over 5 million active infections at that point.

238 The simple SIR model we developed enables visualization of how different levels of control  
239 would affect the speed at which ICU capacity in our country reaches saturation and the  
240 number of cases that would signal the likelihood of this occurring in 2-3 months. Our  
241 projections suggest that transmission should be controlled so that  $R$  does not exceed 1.5 for  
242 any prolonged length of time, in order to avoid overloading the ICU capacity. The model can  
243 also be used to envisage the impact of varying levels of control in different areas within Sri  
244 Lanka, such as in the 6 districts in Sri Lanka categorized as having a high risk of transmission  
245 compared to the other 19 districts which have a lower risk. This could inform healthcare  
246 decision making at a more local level.

247 It may be argued that the SIR model is not applicable in the Sri Lankan context, because there  
248 is, as yet, no full-blown community transmission. However, it is likely that the COVID-19  
249 epidemic in Sri Lanka will move into this phase, as has happened in many other countries  
250 over the past three months, and the SIR model is widely accepted as a means of  
251 conceptualizing the spread of an infectious disease through a population over time (10).

252 The validity of the projections derived from our model depend a great deal on the accuracy of  
253 the assumed parameters, such as the proportion of asymptomatic individuals, the average  
254 period of infectiousness, the proportion of symptomatic individuals who require ICU care, the  
255 duration of ICU stay, etc. The estimates presented here are based on data reported from other  
256 countries where the epidemic is more advanced, and may not necessarily be appropriate in

257 the Sri Lankan context. However, the availability of the app enables the user to change the  
258 parameters as required as more data becomes available.

259 Other web-based applications have been developed, such as the Epidemic Calculator  
260 available at <https://gabgoh.github.io/COVID/index.html>. This application uses a SEIR  
261 (Susceptible, Exposed, Infectious, Removed) model, and although it does not enable  
262 calculation of the saturation of ICU bed capacity, the results produced by our model in terms  
263 of active infections, susceptible individuals and recovered patients are on par with the  
264 Epidemic Calculator under no intervention scenario. We chose not to use a SEIR model  
265 because the data available at this stage in Sri Lanka was insufficient to estimate all the  
266 parameters necessary for such a model.

267 Another web-based app developed at the London School of Hygiene & Tropical Medicine is  
268 available at [https://cmmid-lshtm.shinyapps.io/hospital\\_bed\\_occupancy\\_projections/](https://cmmid-lshtm.shinyapps.io/hospital_bed_occupancy_projections/), to  
269 estimate projected hospital bed occupancy in the UK. However, this app can be used to  
270 forecast COVID-19 bed requirements in a given location for only up to 21 days (e.g. a  
271 healthcare facility, a county, a state) and our estimates were similar to this app.

272 We believe that the model and web based app, which we developed primarily for use in Sri  
273 Lanka, may also be appropriate for use in other low and middle income countries that have  
274 similar constraints for ICU care of COVID-19 patients, but are unable to enforce stringent  
275 lockdown measures for a prolonged period of time due to social and economic reasons.

276

277 **Ending section**

278 **Acknowledgements:**

279 We thank Prof Deirdre Hollingsworth, Prof Don Bundy, Prof Rajitha Wickremasinghe and  
280 Dr Sudath Samaraweera for helpful guidance and comments on the draft manuscript and Dr  
281 Prasad Ranatunga for helpful comments on the web-based application.

282

283 **References**

- 284 1. COVID-19 Basics [Internet]. Johns Hopkins University & Medicine. 2020 [cited 2020  
285 Apr 1]. Available from: <https://coronavirus.jhu.edu/#covid-19-basics>
- 286 2. van Doremalen N, Bushmaker T, Morris DH, Holbrook MG, Gamble A, Williamson  
287 BN, et al. Aerosol and Surface Stability of SARS-CoV-2 as Compared with SARS-  
288 CoV-1. *N Engl J Med*. 2020;
- 289 3. Liu Y, Gayle AA, Wilder-Smith A, Rocklöv J. The reproductive number of COVID-19  
290 is higher compared to SARS coronavirus. *Journal of travel medicine*. 2020.
- 291 4. Lake MA. What we know so far: COVID-19 current clinical knowledge and research.  
292 *Clinical medicine (London, England)*. 2020.
- 293 5. Epidemiology Unit Ministry of Health Sri Lanka [Internet]. Epidemiology Unit  
294 Ministry of Health Sri Lanka. [cited 2020 Apr 15]. Available from:  
295 <http://www.epid.gov.lk/web/index.php?lang=en>
- 296 6. Day M. Covid-19: identifying and isolating asymptomatic people helped eliminate  
297 virus in Italian village. *BMJ*. 2020;
- 298 7. Wu Z, McGoogan JM. Characteristics of and Important Lessons From the Coronavirus  
299 Disease 2019 (COVID-19) Outbreak in China. *JAMA*. 2020;

- 300 8. COVID-19 Dashboard [Internet]. Johns Hopkins University & Medicine, Coronavirus  
301 Resource Centre. 2020 [cited 2020 Apr 6]. Available from:  
302 <https://coronavirus.jhu.edu/map.html>
- 303 9. Obadia T, Haneef R, Boëlle PY. The R0 package: A toolbox to estimate reproduction  
304 numbers for epidemic outbreaks. *BMC Med Inform Decis Mak*. 2012;
- 305 10. White PJ. *Mathematical Models in Infectious Disease Epidemiology*. In: *Infectious*  
306 *Diseases* [Internet]. 4th ed. Elsevier; 2017. p. 49-53.e1. Available from:  
307 <https://linkinghub.elsevier.com/retrieve/pii/B9780702062858000058>  
308  
309

310

311 **Conflict of Interest Statement**

312 All authors have completed the ICMJE uniform disclosure form at  
313 [www.icmje.org/coi\\_disclosure.pdf](http://www.icmje.org/coi_disclosure.pdf) and declare: no support from any organization for the  
314 submitted work; no financial relationships with any organizations that might have an interest  
315 in the submitted work in the previous three years; no other relationships or activities that  
316 could appear to have influenced the submitted work.

317

318

319
